# Supplementary material
Source: Springer Nature journal article supplement (https://www.springermedizin.de/resource/supplementary/11689_2013_63_MOESM9_ESM.pdf/9673228)

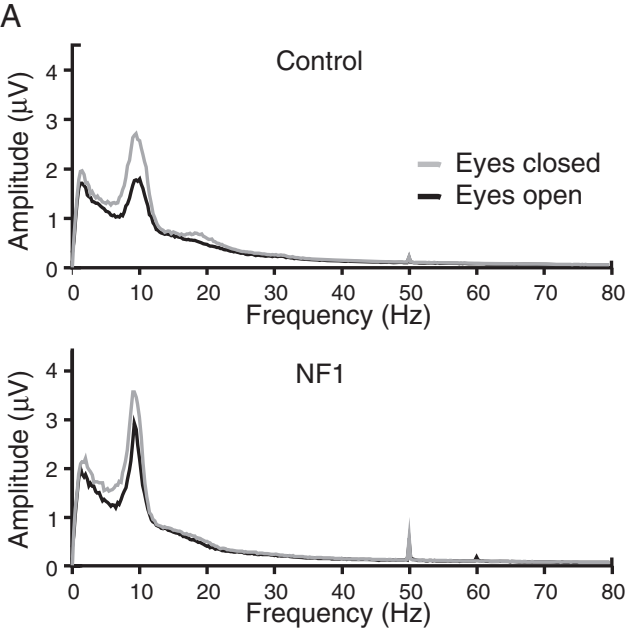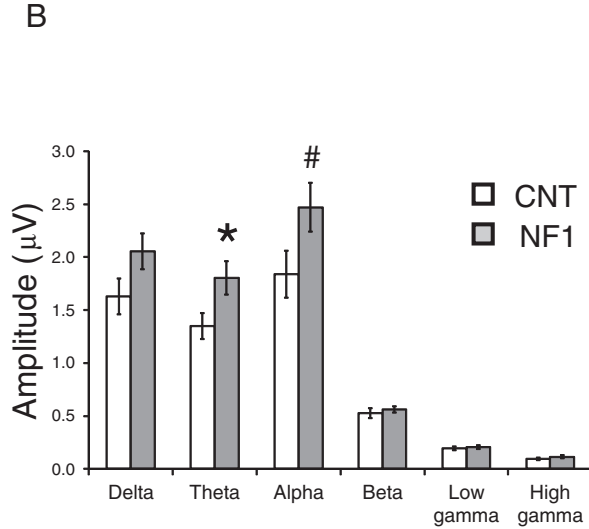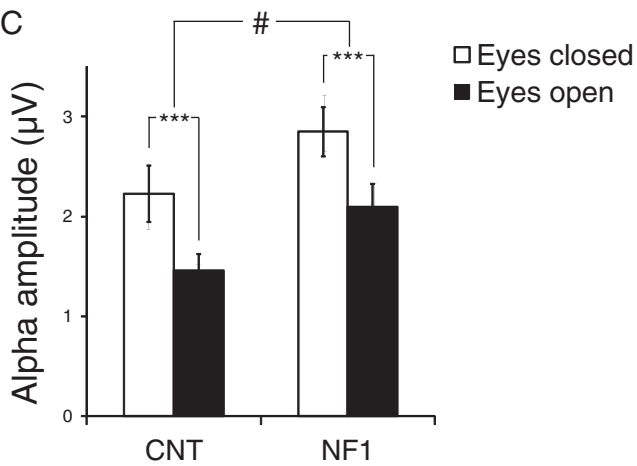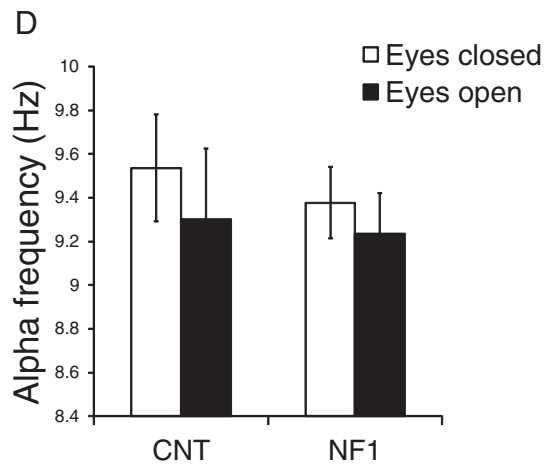

Supplement: MOESM9 [file 9673228]
